# Supplementary material for: Genetic Characterisation and Comparison of Three Human Coronaviruses (HKU1, OC43, 229E) from Patients and Bovine Coronavirus (BCoV) from Cattle with Respiratory Disease in Slovenia
Source: MDPI journal article supplement (doi:10.3390/v13040676), 2021-04-15
Supplement: s1 [file s1]

Table S1. GenBank accession numbers associated with the sequences determined in this study.

| No of sequence | Date of sample collection | Host   | Clinical observation | Name of sample      | Accession Number |
|----------------|---------------------------|--------|----------------------|---------------------|------------------|
| Seq1           | December 22, 2012         | cattle | pneumonia            | BCoV/SLO/TP14/2012  | KX059608         |
| Seq2           | January 21, 2014          | cattle | pneumonia            | BCoV/SLO/TP66/2014  | KX059609         |
| Seq3           | February 12, 2014         | cattle | pneumonia            | BCoV/SLO/TP73/2014  | KX059610         |
| Seq4           | May 21, 2013              | cattle | respiratory          | BCoV/SLO/TZ95/2013  | KX059611         |
| Seq5           | May 21, 2013              | cattle | respiratory          | BCoV/SLO/TZ98/2013  | KX059612         |
| Seq6           | May 21, 2013              | cattle | respiratory          | BCoV/SLO/TZ96/2013  | KX059613         |
| Seq7           | May 21, 2013              | cattle | respiratory          | BCoV/SLO/TZ94/2013  | KX059614         |
| Seq8           | November 22, 2012         | cattle | respiratory          | BCoV/SLO/TZ15/2012  | KX059615         |
| Seq9           | May 21, 2013              | cattle | respiratory          | BCoV/SLO/TZ102/2013 | KX059616         |
| Seq10          | May 21, 2013              | cattle | respiratory          | BCoV/SLO/TZ101/2013 | KX059617         |
| Seq11          | May 21, 2013              | cattle | pneumonia            | BCoV/SLO/TP49/2013  | KX059618         |
| Seq12          | February 18, 2013         | cattle | pneumonia            | BCoV/SLO/TP36/2013  | KX059619         |
| Seq13          | July 16, 2013             | cattle | diarrhoea            | BCoV/SLO/6906/2013  | KX059620         |
| Seq14          | May 21, 2013              | cattle | diarrhoea            | BCoV/SLO/5580/2013  | KX059621         |
| Seq15          | January 7, 2015           | cattle | diarrhoea            | BCoV/SLO/JJ-5/2015  | KX059622         |
| Seq16          | January 21, 2015          | cattle | diarrhoea            | BCoV/SLO/JJ-6/2015  | KX059623         |
| Seq17          | December 29, 2015         | cattle | diarrhoea            | BCoV/SLO/41376/2015 | KX059624         |
| Seq18          | January 18, 2014          | cattle | pneumonia            | BCoV/SLO/TP63/2014  | KX059625         |
| Seq19          | December 28, 2013         | cattle | respiratory          | BCoV/SLO/TZ103/2013 | KX059626         |
| Seq20          | December 28, 2013         | cattle | respiratory          | BCoV/SLO/TZ104/2013 | KX059627         |
| Seq21          | April 17, 2014            | cattle | respiratory          | BCoV/SLO/TZ132/2014 | KX059628         |
| Seq22          | February 1, 2013          | cattle | pneumonia            | BCoV/SLO/TP30/2013  | KX059629         |
| Seq23          | January 23, 2014          | cattle | respiratory          | BCoV/SLO/TZ65/2014  | KX059630         |
| Seq24          | January 23, 2014          | cattle | respiratory          | BCoV/SLO/TZ66/2014  | KX059631         |
| Seq25          | December 24, 2015         | human  | respiratory          | OC43/SLO/60954/2015 | KX059632         |
| Seq26          | February 4, 2016          | human  | respiratory          | OC43/SLO/62706/2016 | KX059633         |
| Seq27          | December 9, 2013          | human  | respiratory          | OC43/SLO/39776/2013 | KX059634         |
| Seq28          | December 13, 2013         | human  | respiratory          | OC43/SLO/39849/2013 | KX059635         |
| Seq29          | February 3, 2014          | human  | respiratory          | OC43/SLO/40296/2014 | KX059636         |
| Seq30          | January 18, 2014          | human  | respiratory          | OC43/SLO/40760/2014 | KX059637         |
| Seq31          | March 27, 2014            | human  | respiratory          | OC43/SLO/43970/2014 | KX059638         |
| Seq32          | March 26, 2014            | human  | respiratory          | OC43/SLO/43979/2014 | KX059639         |
| Seq33          | April 8, 2014             | human  | respiratory          | OC43/SLO/44364/2014 | KX059640         |
| Seq34          | August 14, 2014           | human  | respiratory          | OC43/SLO/46580/2014 | KX059641         |
| Seq35          | November 16, 2015         | human  | respiratory          | OC43/SLO/59988/2015 | KX059642         |
| Seq36          | November 19, 2015         | human  | respiratory          | OC43/SLO/60116/2015 | KX059643         |
| Seq37          | December 2, 2015          | human  | respiratory          | OC43/SLO/60430/2015 | KX059644         |
| Seq38          | December 28, 2015         | human  | respiratory          | OC43/SLO/61010/2015 | KX059645         |
| Seq39          | January 7, 2016           | human  | respiratory          | OC43/SLO/61412/2016 | KX059646         |
| Seq40          | January 8, 2016           | human  | respiratory          | OC43/SLO/61480/2016 | KX059647         |
| Seq41          | January 11, 2016          | human  | respiratory          | OC43/SLO/61531/2016 | KX059648         |
| Seq42          | January 20, 2016          | human  | respiratory          | OC43/SLO/62066/2016 | KX059649         |
| Seq43          | February 5, 2016          | human  | respiratory          | OC43/SLO/62794/2016 | KX059650         |
| Seq44          | February 20, 2016         | human  | respiratory          | OC43/SLO/63863/2016 | KX059651         |
| Seq45          | January 8, 2016           | human  | respiratory          | OC43/SLO/61445/2016 | KX059652         |

*Jevšnik et al., 2021, Supplementary data**Genetic characterisation and comparison of three human coronaviruses (HKU1, OC43, 229E) from patients and bovine coronavirus (BCoV) from cattle with respiratory disease in Slovenia*

| <b>No of sequence</b> | <b>Date of sample collection</b> | <b>Host</b> | <b>Clinical observation</b> | <b>Name of sample</b> | <b>Accession Number</b> |
|-----------------------|----------------------------------|-------------|-----------------------------|-----------------------|-------------------------|
| Seq46                 | January 31, 2016                 | human       | respiratory                 | OC43/SLO/62519/2016   | KX059653                |
| Seq47                 | January 27, 2014                 | human       | respiratory                 | OC43/SLO/41165/2014   | KX059654                |
| Seq48                 | January 29, 2014                 | human       | respiratory                 | OC43/SLO/41313/2014   | KX059655                |
| Seq49                 | February 3, 2014                 | human       | respiratory                 | OC43/SLO/41459/2014   | KX059656                |
| Seq50                 | 19.February 19, 2014             | human       | respiratory                 | OC43/SLO/42347/2014   | KX059657                |
| Seq51                 | March 12, 2014                   | human       | respiratory                 | OC43/SLO/43431/2014   | KX059658                |
| Seq52                 | April 22, 2014                   | human       | respiratory                 | OC43/SLO/44656/2014   | KX059659                |
| Seq53                 | May 17, 2014                     | human       | respiratory                 | OC43/SLO/45151/2014   | KX059660                |
| Seq54                 | May 23 2014                      | human       | respiratory                 | OC43/SLO/45283/2014   | KX059661                |
| Seq55                 | February 21, 2010                | human       | respiratory                 | OC43/SLO/14041/2010   | KX059662                |
| Seq56                 | December 17, 2015                | human       | respiratory                 | HKU1/SLO/60770/2015   | KX059663                |
| Seq57                 | January 25, 2016                 | human       | respiratory                 | HKU1/SLO/62213/2016   | KX059664                |
| Seq58                 | February 28, 2016                | human       | respiratory                 | HKU1/SLO/63860/2016   | KX059665                |
| Seq59                 | December 31, 2015                | human       | respiratory                 | HKU1/SLO/61443/2015   | KX059666                |
| Seq60                 | April 4, 2010                    | human       | respiratory                 | HKU1/SLO/20580/2010   | KX059667                |
| Seq61                 | January 3, 2014                  | human       | respiratory                 | HKU1/SLO/40304/2014   | KX059668                |
| Seq62                 | February 14, 2014                | human       | respiratory                 | HKU1/SLO/42056/2014   | KX059669                |
| Seq63                 | February 18, 2014                | human       | respiratory                 | HKU1/SLO/42284/2014   | KX059670                |
| Seq64                 | March 12, 2014                   | human       | respiratory                 | HKU1/SLO/43609/2014   | KX059671                |
| Seq65                 | November 17, 2015                | human       | respiratory                 | HKU1/SLO/60004/2015   | KX059672                |
| Seq66                 | December 2, 2015                 | human       | respiratory                 | HKU1/SLO/60422/2015   | KX059673                |
| Seq67                 | December 3, 2015                 | human       | respiratory                 | HKU1/SLO/60454/2015   | KX059674                |
| Seq68                 | December 7, 2015                 | human       | respiratory                 | HKU1/SLO/60558/2015   | KX059675                |
| Seq69                 | December 11, 2015                | human       | respiratory                 | HKU1/SLO/60641/2015   | KX059676                |
| Seq70                 | December 13, 2015                | human       | respiratory                 | HKU1/SLO/60668/2015   | KX059677                |
| Seq71                 | December 17, 2015                | human       | respiratory                 | HKU1/SLO/60781/2015   | KX059678                |
| Seq72                 | December 21, 2015                | human       | respiratory                 | HKU1/SLO/60867/2015   | KX059679                |
| Seq73                 | December 29, 2015                | human       | respiratory                 | HKU1/SLO/61107/2015   | KX059680                |
| Seq74                 | January 8, 2016                  | human       | respiratory                 | HKU1/SLO/61456/2016   | KX059681                |
| Seq75                 | January 15, 2016                 | human       | respiratory                 | HKU1/SLO/61833/2016   | KX059682                |
| Seq76                 | January 23, 2016                 | human       | respiratory                 | HKU1/SLO/62150/2016   | KX059683                |
| Seq77                 | January 26, 2016                 | human       | respiratory                 | HKU1/SLO/62234/2016   | KX059684                |
| Seq78                 | January 26, 2016                 | human       | respiratory                 | HKU1/SLO/62261/2016   | KX059685                |
| Seq79                 | February 1, 2016                 | human       | respiratory                 | HKU1/SLO/62556/2016   | KX059686                |
| Seq80                 | February 2, 2016                 | human       | respiratory                 | HKU1/SLO/62637/2016   | KX059687                |
| Seq81                 | February 20, 2016                | human       | respiratory                 | HKU1/SLO/63673/2016   | KX059688                |
| Seq82                 | January 23, 2016                 | human       | respiratory                 | HKU1/SLO/62197/2016   | KX059689                |
| Seq83                 | February 20, 2016                | human       | respiratory                 | HKU1/SLO/63615/2016   | KX059690                |
| Seq84                 | February 16, 2014                | human       | respiratory                 | HKU1/SLO/42161/2014   | KX059691                |
| Seq85                 | February 10, 2016                | human       | respiratory                 | HKU1/SLO/62985/2016   | KX059692                |
| Seq86                 | December 20, 2013                | human       | respiratory                 | HKU1/SLO/39995/2013   | KX059693                |
| Seq87                 | December 20, 2013                | human       | respiratory                 | HKU1/SLO/39999/2013   | KX059694                |
| Seq88                 | December 20, 2013                | human       | respiratory                 | HKU1/SLO/40019/2013   | KX059695                |
| Seq89                 | December 31, 2013                | human       | respiratory                 | HKU1/SLO/40216/2013   | KX059696                |
| Seq90                 | April 6, 2010                    | human       | respiratory                 | 229E/SLO/15756/2010   | KX059697                |
